# Supplementary material for: Auto-amplification and spatial propagation of neutrophil extracellular traps
Source: Springer Nature journal article supplement (doi:10.1038/s42003-024-06074-z), 2024-03-29

## **Supporting information (SI)**

### **Auto-amplification and Spatial Propagation of Neutrophil Extracellular Traps**

**Authors:** Pan Deng<sup>1,2</sup>, Alec Xu<sup>1,2</sup>, Peter M. Grin<sup>2,3</sup>, Kerryn Matthews<sup>1,2</sup>, Simon P. Duffy<sup>1,2,4</sup>, and Hongshen Ma<sup>1,2,5,6</sup>

#### **Affiliations**

<sup>1</sup>Department of Mechanical Engineering, University of British Columbia

<sup>2</sup>Centre for Blood Research, University of British Columbia

<sup>3</sup>Department of Biochemistry and Molecular Biology, University of British Columbia

<sup>4</sup>British Columbia Institute of Technology

<sup>5</sup>School of Biomedical Engineering, University of British Columbia

<sup>6</sup>Vancouver Prostate Centre, Vancouver General Hospital

#### **Corresponding Author**

Hongshen Ma

2054-6250 Applied Science Lane

Vancouver, BC, Canada V6T 1Z4

604.722.5382

[hongma@mech.ubc.ca](mailto:hongma@mech.ubc.ca)

**Supplementary Figure 1:** Percentage of NETs in dHL-60 cells treated with different stimuli in nanowells. Ionomycin (6  $\mu$ M), lipopolysaccharide (LPS, 100  $\mu$ g/mL), phorbol myristate acetate (PMA, 200 nM). For each group, the values shown are the average from 12 different 5 $\times$ 5 nanowell units across three individual microwells; Error bars represent standard deviation.

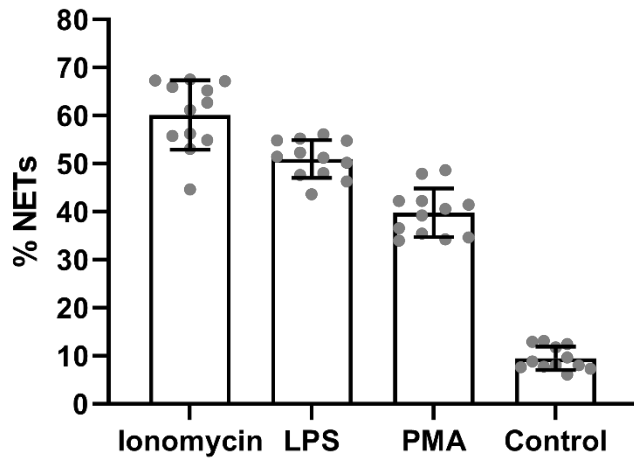

**Supplementary Figure 2.** Residual ionomycin was effectively removed after the washing steps (n=16 per group). For each group, the values shown are the average from 16 different 5×5 nanowell units across three individual microwells; Error bars represent standard deviation.

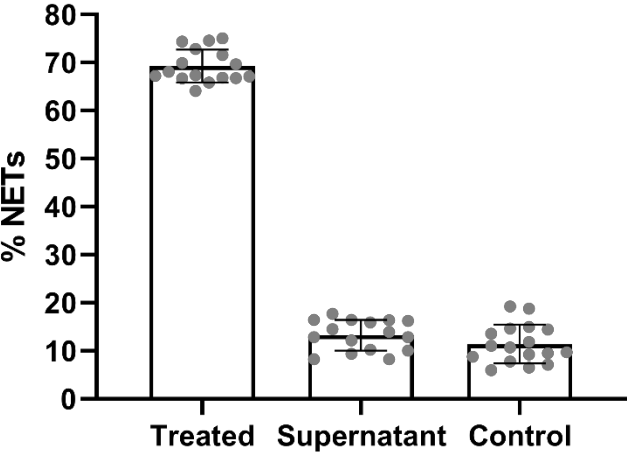

**Supplementary Figure 3.** NETosis propagation starting from a plaque of stimulated cells. (A) Representative images of NETosis propagation at different time points. The NETs plaque formed from stimulated cells (treated cells) was pre-stained with Hoechst (blue). The untreated cells releasing NETs are stained using the membrane-impermeable DNA stain SYTOX Green (green). (B) SYTOX Green images of untreated cells from the selected areas A1 and A2.

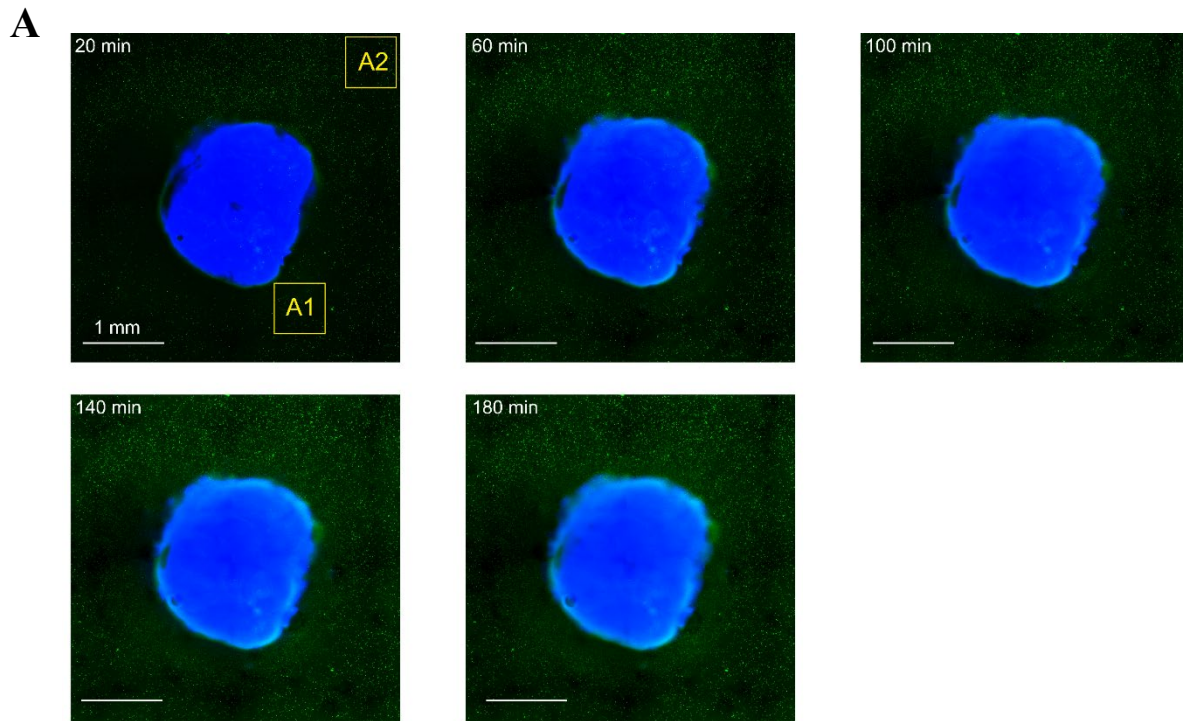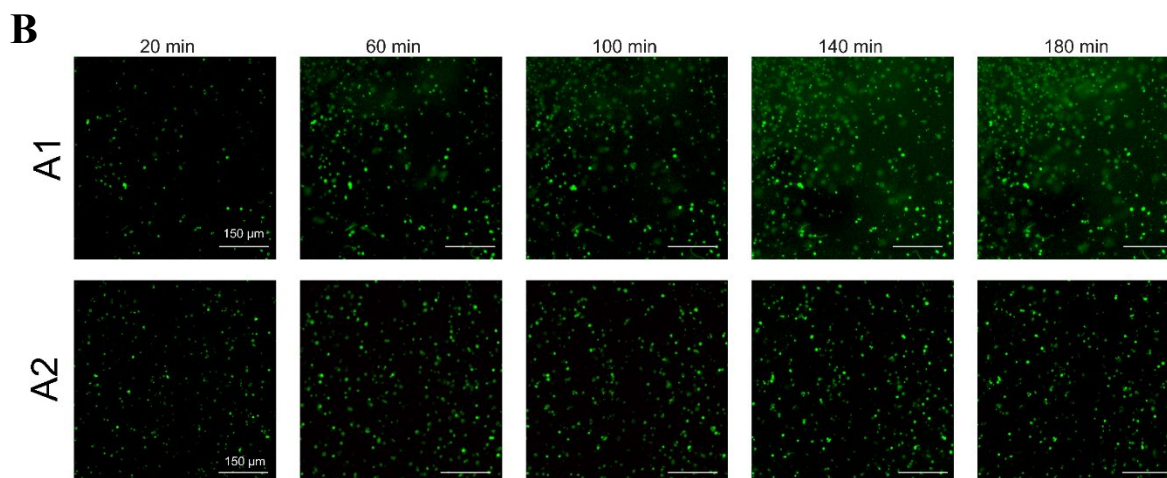

**Supplementary Figure 4.** Another example of NETosis propagation analysis. The NET score distributions at different time points were acquired from 100 x 100 μm square segments across all regions surrounding a NETs plaque. Graphs were obtained in 40 min intervals for 3 hours.

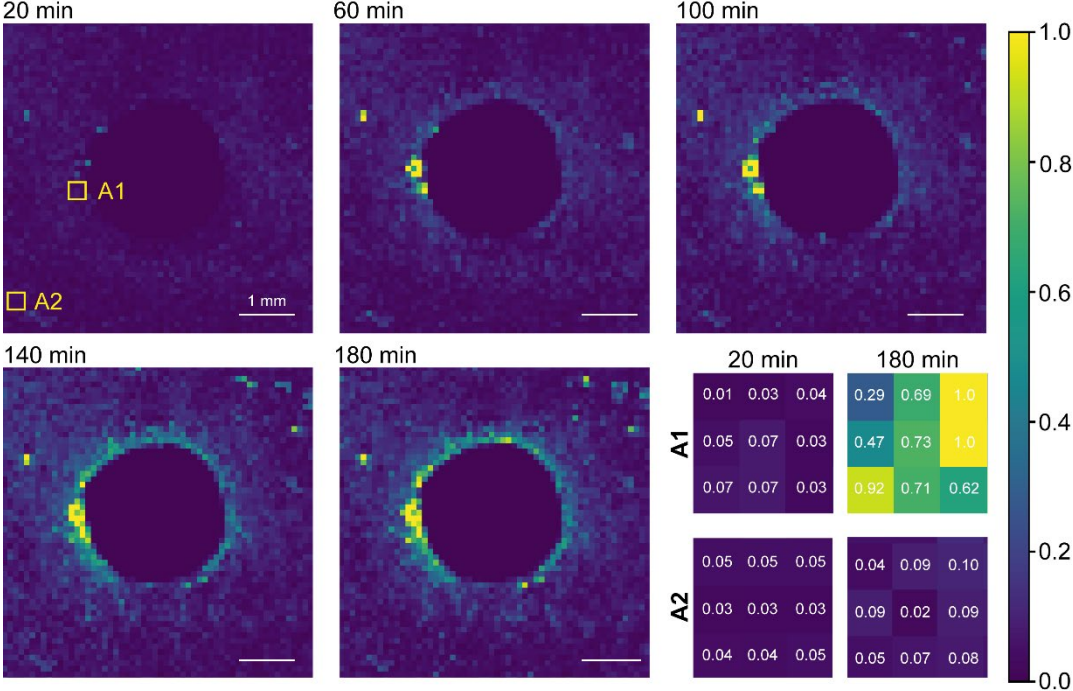

Supplement: 42003_2024_6074_MOESM2_ESM.pdf [file 42003_2024_6074_MOESM2_ESM.pdf]
