# Supplementary material for: Auto-amplification and spatial propagation of neutrophil extracellular traps
Source: Springer Nature journal article supplement (doi:10.1038/s42003-024-06074-z), 2024-03-29
Supplement: 42003_2024_6074_MOESM3_ESM.pdf [file 42003_2024_6074_MOESM3_ESM.pdf]

# Description of Additional Supplementary Files

**File name:** Supplementary Data 1

**Description:** Source data for graphs in the main figures.

**File name:** Supplementary Data 2

**Description:** Source data for graphs in the Supplementary Figures.
